# Supplementary material
Source: PubMed Central journal article supplement (PMC1747487)
Supplement: thorax_60_8_672__1.pdf [file thorax_60_8_672__1.pdf]

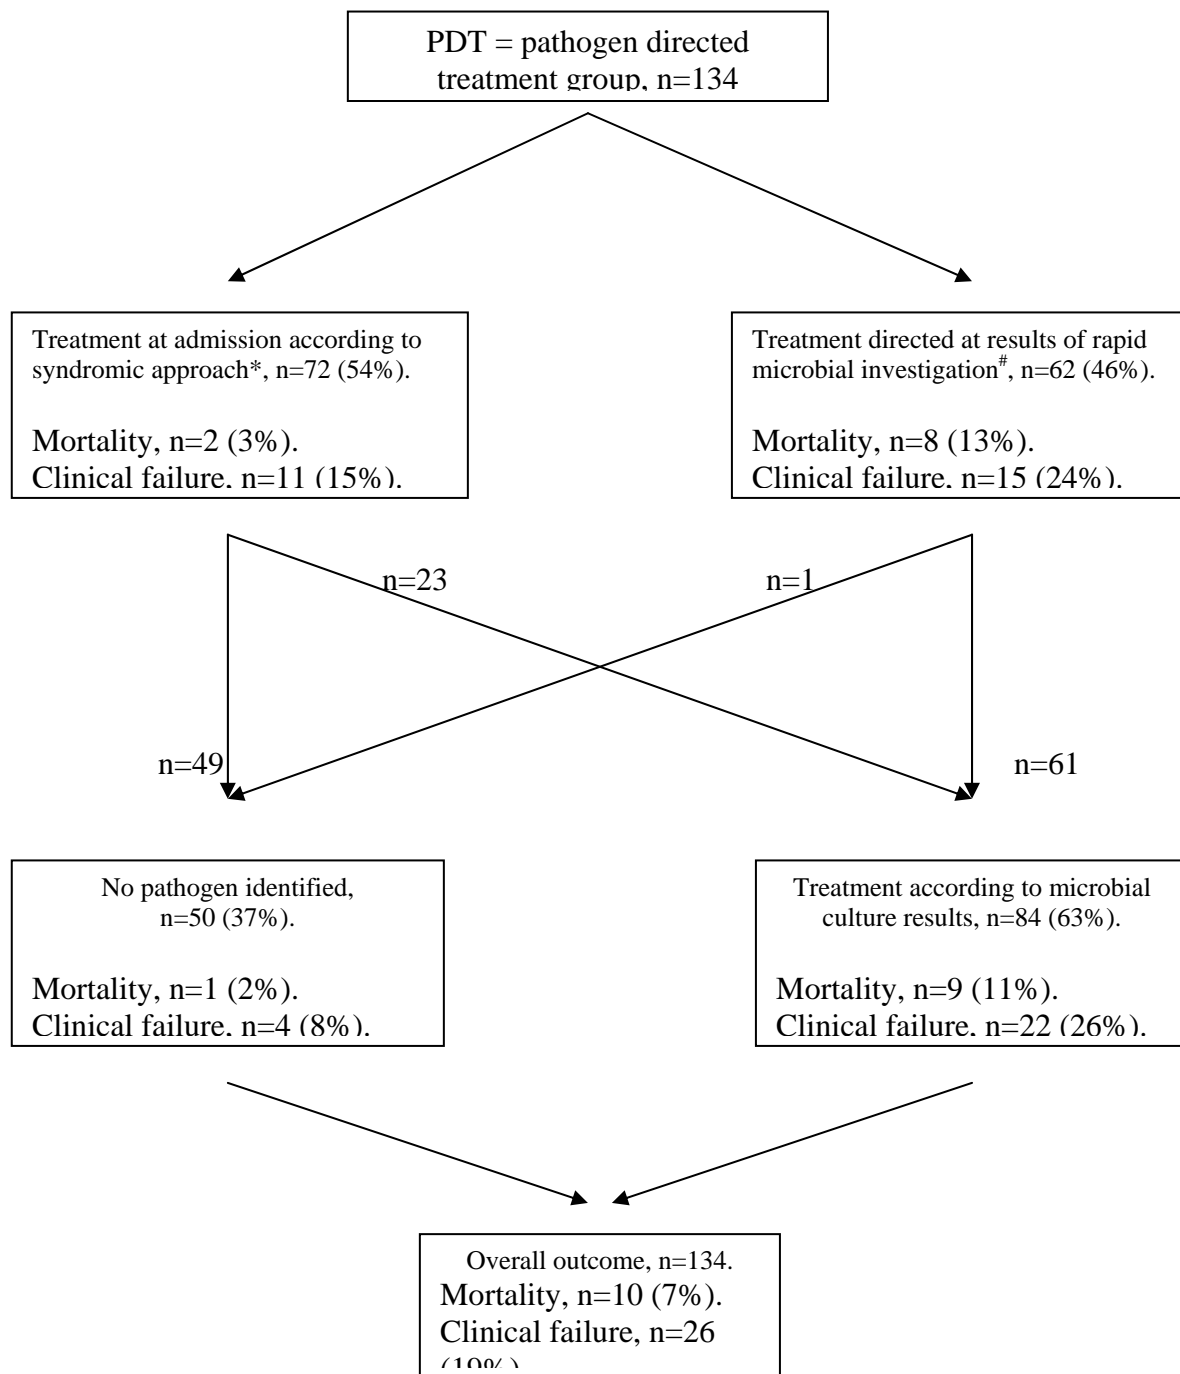

\* Recommended antibiotic treatment according to table 1.

# The results of a Gram stain from sputum or pleural fluid, pneumococcal antigen detection in sputum or pleural fluid, *Legionella pneumophila* serogroup 1 urinary antigen detection test could be obtained within 2 hours of admission, 24 hours a day.

**Figure S1** Outcome of treatment strategies at admission and after obtaining microbial culture results in pathogen directed treatment group.
