# Supplementary material
Source: PubMed Central journal article supplement (PMC1747487)
Supplement: thorax_60_8_672__2.pdf [file thorax_60_8_672__2.pdf]

**Table S1** Reasons for clinical failure on adequate and inadequate antibiotic treatment in patients referred to intensive care unit

| Clinical failure                             | Causes (n)                                             | Mortality (n) | Aetiology (n)                                                             |
|----------------------------------------------|--------------------------------------------------------|---------------|---------------------------------------------------------------------------|
| <i>Early failure on adequate treatment</i>   |                                                        |               |                                                                           |
| PDT, n=7                                     | Persistence of fever (3)                               | No            | <i>Legionella pneumophila</i> (2);<br><i>Streptococcus pneumoniae</i> (1) |
|                                              | Persistence of fever and septic shock (4)              | Yes (4)       | <i>S pneumoniae</i> (4)                                                   |
| EAT, n=5                                     | Persistence of fever (1)                               | No            | <i>L pneumophila</i> (1)                                                  |
|                                              | Persistence of fever and respiratory insufficiency (1) | Yes (1)       | <i>Escherichia coli</i> (1)                                               |
|                                              | Persistence of fever and septic shock (2)              | Yes (2)       | <i>Haemophilus influenzae</i> (1); <i>L pneumophila</i> (1)               |
|                                              | Respiratory insufficiency (1)                          | Yes (1)       | <i>S pneumoniae</i> (1)                                                   |
| <i>Early failure on inadequate treatment</i> |                                                        |               |                                                                           |
| PDT, n=1                                     | Respiratory insufficiency (1)                          | Yes (1)‡      | <i>Moraxella catarrhalis</i> + <i>L pneumophila</i> (1)†                  |
| EAT, n=2                                     | Respiratory insufficiency (2)                          | Yes (2)       | <i>Staphylococcus aureus</i> (1);<br>unknown aetiology (1)                |
| <i>Late failure</i>                          |                                                        |               |                                                                           |
| EAT, n=4                                     | Exacerbation of pulmonary or cardiac co-morbidity (3)  | Yes (3)       | <i>S pneumoniae</i> (2); unknown aetiology (1)                            |
|                                              | Nosocomial infection (1)                               | Yes (1)       | Unknown aetiology (1)                                                     |

PDT, pathogen directed treatment group; EAT, empirical antibiotic treatment group.

†Mixed infection.

‡Treatment initially consisted of amoxicillin-clavulanate.
